# Supplementary material
Source: MDPI journal article supplement (https://www.mdpi.com/2297-8739/9/3/77)
Supplement: s1 [file s1]

# $\mu$ QuEChERS Combined with UHPLC-PDA as a State-of-the-Art Analytical Approach for Quantification of Chlorpropham in Potato

Telma M. Gomes <sup>1</sup>, Rosa Perestrelo <sup>1</sup> and José S. Câmara <sup>1,2,\*</sup>

<sup>1</sup> CQM—Centro de Química da Madeira, PNRG, Universidade da Madeira, Campus da Penteada, 9020-105 Funchal, Portugal; telmamarisagomes@gmail.com (T.M.G.), rmp@staff.uma.pt (R.P.)

<sup>2</sup> Departamento de Química, Faculdade de Ciências Exatas e da Engenharia, Universidade da Madeira, Campus da Penteada, 9020-105 Funchal, Portugal

\* Correspondence: jsc@staff.uma.pt; Tel.: +351291705112

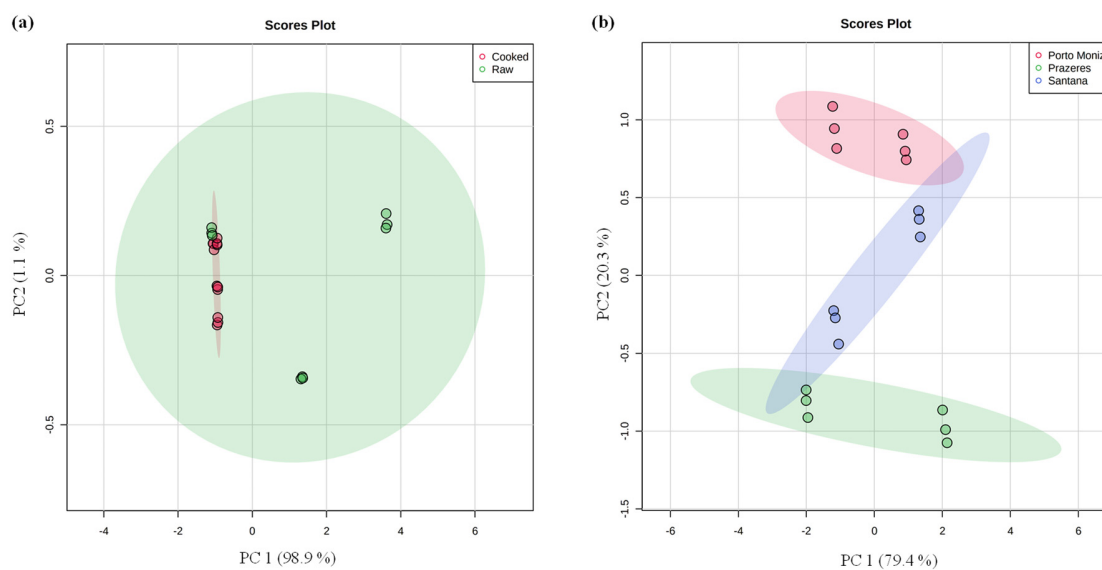

**Figure S1.** (a) Principal component analysis (PCA) of raw and cooked of different parts of potatoes, and (b) Principal component analysis (PCA) of different parts of potatoes by geographical regions.
